# Supplementary material for: Glioblastoma cells vampirize WNT from neurons and trigger a JNK/MMP signaling loop that enhances glioblastoma progression and neurodegeneration
Source: PubMed Central journal article supplement (PMC6917273; doi:10.1371/journal.pbio.3000545), 2019-12-17

Control Glioma Glioma Glioma  
                  *igl*<sup>RNAi</sup> *Fz1*<sup>RNAi</sup>

Control Glioma Glioma Glioma  
                  *igl*<sup>RNAi</sup> *Fz1*<sup>RNAi</sup>

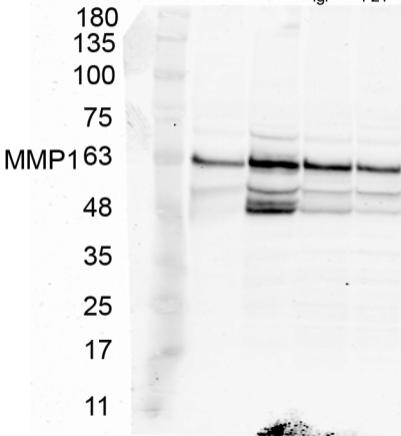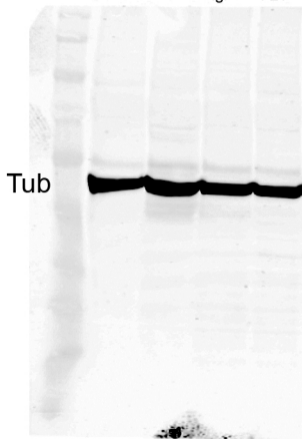

# Control Glioma

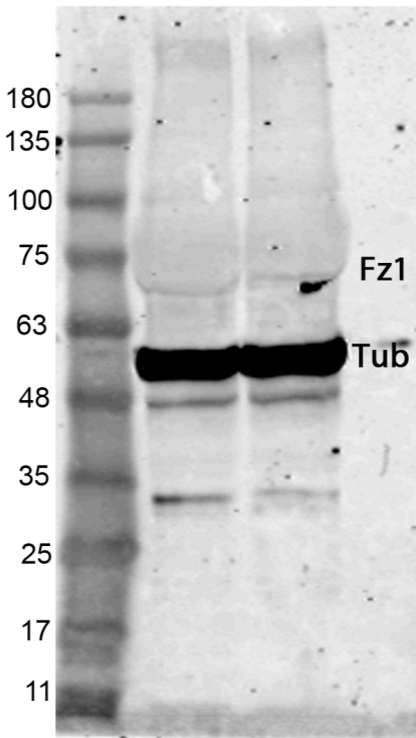

Supplement: pbio.3000545.s019.pdf [file pbio.3000545.s019.pdf]
